# Supplementary material for: "Spatio-temporal Dynamics and Risk Cluster Analysis of Highly Pathogenic Avian Influenza HPAI (H5N1) in Poultry: Advancing Outbreak Management through Customized Regional Strategies in Egypt"
Source: Research Square preprint supplement (doi:10.21203/rs.3.rs-3361650/v1), 2024-02-23
Supplement: Supplementary file 1 [file 0e8b8e07c20c59cdb38d4a5f.xlsx]

## Sheet: Table (1)
Table (1): Number of outbreaks during each of the six epidemic waves in each city in Menofia governorate.
Eidemic Wave	CITY
		Ashmun	ElBagur	Berkat ElSabae	Sadat City	ElShohadaa	Qwesna	Minuf	Tala	Shibin ElKom
1st EW	CASES	480106	174584	523752	43646	87292	1003858	87292	87292	392814
	%	16.7	6.1	18.2	1.5	3	34.8	3	3	13.6
2nd EW	CASES	218230	261876	698336	87292	174584	261876	392814	87292	305522
	%	8.8	10.5	28.1	3.5	7	10.5	15.8	3.5	12.3
3rd EW	CASES	436460	87292	130938	87292	0	0	43646	174584	349168
	%	33.3	6.7	10	6.7	0	0	3.3	13.3	26.7
4th EW	CASES	2924282	2313238	1396672	218230	960212	2313238	4059078	1265734	1047504
	%	17.7	14	8.5	1.3	5.8	14	24.6	7.7	6.3
5th EW	CASES	1091150	87292	87292	0	0	872920	305522	87292	0
	%	43.1	3.4	3.4	0	0	34.5	12.1	3.4	0
6th EW	CASES	1047504	218230	130938	0	261876	174584	698336	130938	392814
	%	34.3	7.1	4.3	0	8.6	5.7	22.9	4.3	12.9

## Sheet: Table (2)
Table (2): Daily, weekly, and monthly significant clusters of HPAI H5N1 outbreaks detected by space-time permutation scan statistic for six epidemic waves in Menofia governorate
Epidemic wave		Cluster type	Coordinates / radius (Km)	Time period (Days)	Observed cases	Expected cases	Relative risk	Likelihood ratio statistic	P-value
EW1	Daily based outbreak	P	(30.682000 N, 30.948000 E) / 0 km	2006/5/2 to 2006/5/2	87292	2645.21	33	221828	< 0.00001
		S1	(30.360700 N, 30.668600 E) / 26.37 km	2006/4/6 to 2006/4/20	130938	9919.55	13.2	219417	< 0.00001
		S2	(30.439720 N, 31.121670 E) / 9.98 km	2006/3/5 to 2006/3/21	349168	100518	3.47	197606	< 0.00001
		S3	(30.594676 N, 31.072450 E) / 5.76 km	2006/3/22 to 2006/4/1	654690	347184	1.89	127235	< 0.00001
		S4	(30.573330 N, 30.898610 E) / 2.67 km	2006/3/26 to 2006/3/27	87292	11903.5	7.33	99534	< 0.00001
	Weekly based outbreak	P	(30.682000 N, 30.948000 E) / 0 km	2006/4/26 to 2006/5/2	87292	2645.21	33	221828	< 0.00001
		S1	(30.360700 N, 30.668600 E) / 26.37 km	2006/4/5 to 2006/4/25	130938	9919.55	13.2	219417	< 0.00001
		S2	(30.439720 N, 31.121670 E) / 9.98 km	2006/3/1 to 2006/3/21	349168	100518	3.47	197606	< 0.00001
		S3	(30.594676 N, 31.072450 E) / 5.76 km	2006/3/22 to 2006/4/4	654690	367023	1.78	108354	< 0.00001
	Monthly based outbreak	P	(30.360700 N, 30.668600 E) / 26.37 km	2006/4/3 to 2006/5/2	130938	17855.2	7.33	150065	< 0.00001
		S1	(30.682000 N, 30.948000 E) / 0 km	2006/4/3 to 2006/5/2	87292	11903.5	7.33	99534	< 0.00001
		S2	(30.558600 N, 30.996800 E) / 12.08 km	2006/2/17 to 2006/4/2	1047504	904663	1.16	16018.3	< 0.00001
EW2	Daily based outbreak	P	(30.600427 N, 30.851024 E) / 12.60 km	2007/1/10 to 2007/1/11	261876	41348.8	6.33	273103	< 0.00001
		S1	(30.606800 N, 31.127100 E) / 5.29 km	2006/12/20 to 2006/12/26	305522	58960.4	5.18	269031	< 0.00001
		S2	(30.476110 N, 31.035830 E) / 8.55 km	2006/12/29 to 2007/1/6	305522	67383.3	4.53	235815	< 0.00001
		S3	(30.558600 N, 30.996800 E) / 0 km	2007/3/27 to 2007/3/29	87292	3062.88	28.5	209635	< 0.00001
		S4	(30.644000 N, 31.052000 E) / 0 km	2007/1/8 to 2007/1/8	87292	3062.88	28.5	209635	< 0.00001
		S5	(30.331700 N, 31.025700 E) / 0 km	2007/2/21 to 2007/2/22	87292	4594.32	19	175721	< 0.00001
		S6	(30.674837 N, 31.027776 E) / 0 km	2006/12/17 to 2006/12/17	87292	6125.75	14.25	152089	< 0.00001
		S7	(30.317200 N, 31.030600 E) / 0 km	2006/12/17 to 2006/12/17	87292	6125.75	14.25	152089	< 0.00001
		S8	(30.360700 N, 30.668600 E) / 11.91 km	2007/1/17 to 2007/2/6	87292	6125.75	14.25	152089	< 0.00001
		S9	(30.417000 N, 30.900000 E) / 4.79 km	2006/12/27 to 2006/12/27	87292	7657.19	11.4	134093	< 0.00001
		S10	(30.452420 N, 31.124674 E) / 0 km	2007/2/22 to 2007/2/22	43646	1531.44	28.5	104454	< 0.00001
		S11	(30.649000 N, 30.998000 E) / 3.83 km	12/27/2006 to 2006/12/27	87292	11485.8	7.6	102407	< 0.00001
	Weekly based outbreak	P	(30.586390 N, 30.947780 E) / 6.56 km	2007/3/26 to 2007/4/8	174584	21440.1	8.14	217840	< 0.00001
		S1	(30.331700 N, 31.025700 E) / 0 km	2007/2/19 to 2007/2/25	87292	4594.32	19	175721	< 0.00001
		S2	(30.476110 N, 31.035830 E) / 8.55 km	2007/1/1 to 2007/1/7	218230	49006	4.45	162737	< 0.00001
		S3	(30.360700 N, 30.668600 E) / 11.91 km	2007/1/15 to 2007/2/11	87292	6125.75	14.25	152089	< 0.00001
		S4	(30.603288 N, 31.087040 E) / 3.52 km	2006/12/18 to 2006/12/24	174584	34457.4	5.07	147248	< 0.00001
		S5	(30.486522 N, 30.898059 E) / 4.89 km	2006/11/16 to 2006/11/26	87292	9188.63	9.5	119660	< 0.00001
		S6	(30.553693 N, 31.204539 E) / 8.31 km	2006/12/11 to 2006/12/31	392814	179178	2.19	104910	< 0.00001
		S7	(30.674837 N, 31.027776 E) / 0 km	2006/12/11 to 2006/12/17	87292	12251.5	7.13	97515.9	< 0.00001
		S8	(30.644000 N, 31.052000 E) / 0 km	2007/1/8 to 2007/1/14	87292	12251.5	7.13	97515.9	< 0.00001
		S9	(30.509617 N, 30.948347 E) / 1.23 km	2007/1/8 to 2007/1/14	87292	12251.5	7.13	97515.9	< 0.00001
		S10	(30.737603 N, 30.940699 E) / 10.06 km	2007/1/8 to 2007/1/14	87292	12251.5	7.13	97515.9	< 0.00001
		S11	(30.452420 N, 31.124674 E) / 0 km	2007/2/19 to 2007/2/25	43646	2297.16	19	87510	< 0.00001
	Monthly based outbreak	P	(30.586390 N, 30.947780 E) / 6.56 km	2007/3/8 to 2007/4/6	174584	21440.1	8.14	217840	< 0.00001
		S1	(30.331700 N, 31.025700 E) / 0 km	2007/2/6 to 2007/3/7	87292	6125.75	14.25	152089	< 0.00001
		S2	(30.616670 N, 31.050000 E) / 3.25 km	2007/1/7 to 2007/2/5	174584	50537.5	3.45	95595.3	< 0.00001
		S3	(30.452420 N, 31.124674 E) / 0 km	2007/2/6 to 2007/3/7	43646	3062.88	14.25	75706.9	< 0.00001
		S4	(30.521000 N, 30.959000 E) / 1.47 km	2007/1/7 to 2/5/2007	87292	16845.8	5.18	74176.7	< 0.00001
		S5	(30.682000 N, 30.948000 E) / 4.73 km	2007/1/7 to 2007/2/5	87292	16845.8	5.18	74176.7	< 0.00001
		S6	(30.599369 N, 31.181697 E) / 10.26 km	2006/11/16 to 2007/1/6	611044	3015-04-26	1.5	54388.4	< 0.00001
		S7	(30.465000 N, 31.030560 E) / 7.36 km	2006/11/16 to 2007/1/6	2616-12-27	174584	1.5	20557.7	< 0.00001
EW3	Daily based outbreak	P	(30.388330 N, 31.092500 E) / 6.87 km	2008/1/8 to 2008/1/8	174584	23277.9	7.5	209735	< 0.00001
		S1	(30.428200 N, 30.765100 E) / 20.97 km	2007/12/24 to 2008/1/2	261876	61104.4	4.29	197422	< 0.00001
		S2	(30.365500 N, 31.020900 E) / 0 km	2007/12/21 to 2007/12/23	130938	13093.8	10	189178	< 0.00001
		S3	(30.536589 N, 31.123719 E) / 9.29 km	2008/1/16 to 2008/1/26	130938	13093.8	10	189178	< 0.00001
		S4	(30.534400 N, 31.016100 E) / 0 km	2008/1/6 to 2008/1/6	87292	5819.47	15	157519	< 0.00001
		S5	(30.682000 N, 30.948000 E) / 0 km	2008/1/5 to 2008/1/5	87292	5819.47	15	157519	< 0.00001
		S6	(30.309915 N, 30.961039 E) / 2.14 km	2008/3/10 to 2008/3/11	87292	5819.47	15	157519	< 0.00001
		S7	(30.628000 N, 31.016000 E) / 2.87 km	2008/1/3 to 2008/1/3	87292	5819.47	15	157519	< 0.00001
		S8	(30.536368 N, 30.975540 E) / 0 km	2008/2/7 to 2008/2/7	87292	11638.9	7.5	102481	< 0.00001
	Weekly based outbreak	P	(30.536589 N, 31.123719 E) / 9.29 km	2008/1/16 to 2008/1/29	130938	13093.8	10	189178	< 0.00001
		S1	(30.568200 N, 30.871300 E) / 12.97 km	2008/2/6 to 2008/2/12	218230	50920.3	4.29	161928	< 0.00001
		S2	(30.309915 N, 30.961039 E) / 2.14 km	2008/3/5 to 2008/3/11	87292	5819.47	15	157519	< 0.00001
		S3	(30.365500 N, 31.020900 E) / 0 km	2007/12/21 to 2008/1/1	130938	26187.6	5	110383	< 0.00001
		S4	(30.674837 N, 31.027776 E) / 0 km	2008/1/9 to 2008/1/15	43646	1454.87	30	106945	< 0.00001
		S5	(30.388330 N, 31.092500 E) / 6.87 km	2008/1/2 to 2008/1/8	174584	75653.1	2.31	51141.7	< 0.00001
	Monthly based outbreak	P	(30.309915 N, 30.961039 E) / 2.14 km	2008/2/11 to 2008/3/11	87292	5819.47	15	157519	< 0.00001
		S1	(30.638427 N, 31.003802 E) / 12.88 km	2007/12/21 to 2008/2/10	654690	611044	1.07	2916.22	< 0.00001
EW4	Daily based outbreak	P	(30.447752 N, 31.092245 E) / 10.21 km	2010/2/13 to 2010/5/18	2051362	754221	2.72	810364	< 0.00001
		S1	(30.569347 N, 31.117016 E) / 4.32 km	2011/4/27 to 2011/5/27	567398	59233.9	9.58	781846	< 0.00001
		S2	(30.600000 N, 31.150000 E) / 0.38 km	2011/7/27 to 2011/7/29	261876	7620.73	34.36	673970	< 0.00001
		S3	(30.400000 N, 30.983000 E) / 0 km	2011/6/15 to 2011/6/16	218230	4618.62	47.25	629153	< 0.00001
		S4	(30.253000 N, 31.058000 E) / 0 km	2012/1/29 to 2012/1/29	174584	1847.45	94.5	622284	< 0.00001
		S5	(30.308575 N, 31.048780 E) / 0 km	2009/12/23 to 2010/1/2	174584	1847.45	94.5	622284	< 0.00001
		S6	(30.638726 N, 30.933144 E) / 3.60 km	2010/6/14 to 2010/6/16	218230	5195.95	42	604019	< 0.00001
		S7	(30.621300 N, 31.045000 E) / 3.96 km	2010/8/20 to 2011/1/3	480106	66046.3	7.27	543564	< 0.00001
		S8	(30.467086 N, 30.828240 E) / 5.98 km	2010/2/21 to 2010/2/24	218230	7505.26	29.08	526050	< 0.00001
		S9	(30.649000 N, 30.998000 E) / 1.14 km	2011/7/29 to 2011/9/17	174584	3233.04	54	525955	< 0.00001
		S10	(30.583330 N, 30.900000 E) / 4.58 km	2010/2/13 to 2010/3/9	480106	69856.7	6.87	520350	< 0.00001
		S11	(30.648000 N, 31.154000 E) / 0 km	2012/1/24 to 2012/1/26	130938	1039.19	126	503867	< 0.00001
		S12	(30.267000 N, 31.000000 E) / 0 km	2009/11/8 to 2009/11/12	130938	1039.19	126	503867	< 0.00001
		S13	(30.551860 N, 31.028263 E) / 2.47 km	2009/1/26 to 2009/2/8	130938	1385.59	94.5	466542	< 0.00001
		S14	(30.605000 N, 30.843000 E) / 0.92 km	2010/9/13 to 2010/9/28	174584	5195.95	33.6	445065	< 0.00001
		S15	(30.271000 N, 31.082000 E) / 2.74 km	2010/10/12 to 2010/10/12	174584	5542.35	31.5	434140	< 0.00001
		S16	(30.467000 N, 30.900000 E) / 0 km	2010/2/6 to 2010/2/6	87292	461.86	189	370961	< 0.00001
		S17	(30.433000 N, 30.900000 E) / 0 km	2012/2/3 to 2012/2/3	87292	461.86	189	370961	< 0.00001
		S18	(30.510830 N, 30.998060 E) / 0 km	2009/4/28 to 2009/4/28	87292	461.86	189	370961	< 0.00001
		S19	(30.521000 N, 30.959000 E) / 0 km	2010/7/11 to 2010/7/11	87292	461.86	189	370961	< 0.00001
		S20	(30.458999 N, 30.918998 E) / 0 km	2009/1/9 to 2009/9/30	218230	16165.2	13.5	367164	< 0.00001
		S21	(30.459000 N, 30.919000 E) / 0 km	2011/2/23 to 2011/2/23	87292	923.72	94.5	310915	< 0.00001
		S22	(30.523000 N, 30.977000 E) / 0 km	2012/1/4 to 2012/1/4	87292	923.72	94.5	310915	< 0.00001
		S23	(30.560716 N, 31.000078 E) / 0 km	2011/7/27 to 2011/7/27	130938	4849.56	27	305945	< 0.00001
		S24	(30.497623 N, 30.913261 E) / 3.44 km	2011/3/15 to 2011/3/22	174584	13855.9	12.6	282401	< 0.00001
		S25	(30.509666 N, 30.976698 E) / 1.28 km	2010/3/29 to 2010/3/29	87292	1616.52	54	262754	< 0.00001
	Weekly based outbreak	P	(30.447752 N, 31.092245 E) / 10.21 km	2010/2/13 to 2010/5/21	2051362	754221	2.72	810364	< 0.00001
		S1	(30.569347 N, 31.117016 E) / 4.32 km	2011/4/23 to 2011/5/27	567398	59233.9	9.58	781846	< 0.00001
		S2	(30.600000 N, 31.150000 E) / 0.38 km	2011/7/23 to 2011/7/29	261876	7620.73	34.36	673970	< 0.00001
		S3	(30.308310 N, 31.023530 E) / 5.12 km	2009/11/7 to 2010/1/8	305522	16511.6	18.5	605039	< 0.00001
		S4	(30.638726 N, 30.933144 E) / 3.60 km	2010/6/12 to 2010/6/18	218230	5195.95	42	604019	< 0.00001
		S5	(30.371835 N, 30.959693 E) / 4.41 km	2011/6/11 to 2011/6/17	305522	20322	15.03	545345	< 0.00001
		S6	(30.621300 N, 31.045000 E) / 3.96 km	2010/8/14 to 2011/1/7	480106	70549.5	6.81	516287	< 0.00001
		S7	(30.648000 N, 31.154000 E) / 0 km	2012/1/21 to 2012/1/27	130938	1039.19	126	503867	< 0.00001
		S8	(30.253000 N, 31.058000 E) / 0 km	2012/1/28 to 2012/2/3	174584	3694.9	47.25	503100	< 0.00001
		S9	(30.583330 N, 30.900000 E) / 4.58 km	2010/2/13 to 2010/3/12	480106	78747.5	6.1	471504	< 0.00001
		S10	(30.467086 N, 30.828240 E) / 5.98 km	2010/2/20 to 2010/2/26	218230	10507.4	20.77	455586	< 0.00001
		S11	(30.605000 N, 30.843000 E) / 0.92 km	2010/9/11 to 2010/10/1	174584	5195.95	33.6	445065	< 0.00001
		S12	(30.271000 N, 31.082000 E) / 2.74 km	2010/10/9 to 2010/10/15	174584	5542.35	31.5	434140	< 0.00001
		S13	(30.649000 N, 30.998000 E) / 1.14 km	2011/7/23 to 2011/9/23	174584	6004.21	29.08	420623	< 0.00001
		S14	(30.551860 N, 31.028263 E) / 2.47 km	2009/1/24 to 2009/2/13	130938	2078.38	63	414139	< 0.00001
		S15	(30.510830 N, 30.998060 E) / 0 km	2009/4/25 to 2009/5/1	87292	461.86	189	370961	< 0.00001
		S16	(30.521000 N, 30.959000 E) / 0 km	2010/7/10 to 2010/7/16	87292	461.86	189	370961	< 0.00001
		S17	(30.458999 N, 30.918998 E) / 0 km	2009/1/2 to 2009/10/2	218230	16742.5	13.03	360076	< 0.00001
		S18	(30.459000 N, 30.919000 E) / 0 km	2012/1/7 to 2012/1/13	87292	923.72	94.5	310915	< 0.00001
		S19	(30.523000 N, 30.977000 E) / 0 km	2011/12/31 to 2012/1/6	87292	923.72	94.5	310915	< 0.00001
		S20	(30.509666 N, 30.976698 E) / 1.28 km	2011/4/9 to 2011/4/15	87292	1616.52	54	262754	< 0.00001
		S21	(30.482623 N, 30.890084 E) / 0 km	2011/3/19 to 2011/3/25	87292	2078.38	42	241276	< 0.00001
	Monthly based outbreak	P	(30.576390 N, 31.156700 E) / 5.17 km	2011/4/17 to 2011/8/14	1003858	243402	4.12	679976	< 0.00001
		S1	(30.447752 N, 31.092245 E) / 10.21 km	2010/1/22 to 2010/5/21	2138654	901786	2.37	660371	< 0.00001
		S2	(30.638726 N, 30.933144 E) / 3.60 km	2010/5/22 to 2010/6/20	218230	5195.95	42	604019	< 0.00001
		S3	(30.308310 N, 31.023530 E) / 5.12 km	2009/10/24 to 2010/1/21	305522	30482.9	10.02	431455	< 0.00001
		S4	(30.649000 N, 30.998000 E) / 1.14 km	2011/7/16 to 2011/10/13	174584	6004.21	29.08	420623	< 0.00001
		S5	(30.253000 N, 31.058000 E) / 0 km	2012/1/12 to 2012/2/10	174584	6927.94	25.2	396554	< 0.00001
		S6	(30.400000 N, 30.983000 E) / 0 km	2011/6/16 to 2011/7/15	130938	2771.17	47.25	377158	< 0.00001
		S7	(30.424933 N, 30.617138 E) / 20.76 km	2009/4/27 to 2009/6/25	130938	2886.64	45.36	371927	< 0.00001
		S8	(30.551860 N, 31.028263 E) / 2.47 km	2009/1/2 to 2009/2/25	130938	3117.57	42	362079	< 0.00001
		S9	(30.458999 N, 30.918998 E) / 0 km	2009/1/2 to 2009/10/23	218230	16742.5	13.03	360076	< 0.00001
		S10	(30.583330 N, 30.900000 E) / 4.58 km	2010/1/22 to 2010/3/22	480106	105420	4.55	357496	< 0.00001
		S11	(30.416670 N, 30.850000 E) / 4.79 km	2009/10/24 to 2009/11/22	174584	10507.4	16.62	327381	< 0.00001
		S12	(30.510830 N, 30.998060 E) / 0 km	2009/4/27 to 2009/5/26	87292	923.72	94.5	310915	< 0.00001
		S13	(30.271000 N, 31.082000 E) / 2.74 km	2010/9/19 to 2010/10/18	174584	12470.3	14	299423	< 0.00001
		S14	(30.600427 N, 30.851024 E) / 0.92 km	2010/8/20 to 2010/10/18	174584	13278.5	13.15	289259	< 0.00001
		S15	(30.521000 N, 30.959000 E) / 0 km	2010/6/21 to 2010/7/20	87292	1385.59	63	275980	< 0.00001
		S16	(30.341860 N, 30.855531 E) / 3.00 km	2009/12/23 to 2010/1/21	130938	7505.26	17.45	251398	< 0.00001
		S17	(30.560716 N, 31.000078 E) / 0 km	2011/5/17 to 2011/8/14	218230	31522.1	6.92	236599	< 0.00001
		S18	(30.523000 N, 30.977000 E) / 0 km	2011/12/13 to 2012/1/11	87292	2309.31	37.8	232308	< 0.00001
EW5	Daily based outbreak	P	(30.500291 N, 31.072923 E) / 4.04 km	2012/11/26 to 2012/12/4	261876	27090.6	9.67	370695	< 0.00001
		S1	(30.417000 N, 30.900000 E) / 14.01 km	2013/2/7 to 2013/4/27	567398	158029	3.59	353456	< 0.00001
		S2	(30.250000 N, 31.067000 E) / 0 km	2012/11/4 to 2012/11/5	130938	6772.66	19.33	266755	< 0.00001
		S3	(30.578633 N, 31.218622 E) / 6.61 km	2012/12/6 to 2012/12/27	349168	81271.9	4.3	256315	< 0.00001
		S4	(30.533000 N, 31.167000 E) / 0 km	2012/10/18 to 2012/10/25	174584	21070.5	8.29	220443	< 0.00001
		S5	(30.276390 N, 31.062500 E) / 0 km	2013/2/20 to 2013/2/20	87292	3010.07	29	211077	< 0.00001
		S6	(30.658000 N, 31.005000 E) / 0 km	2012/12/11 to 2012/12/11	87292	3010.07	29	211077	< 0.00001
		S7	(30.662955 N, 31.073894 E) / 2.97 km	2012/10/15 to 2012/10/16	87292	3010.07	29	211077	< 0.00001
		S8	(30.297742 N, 30.978380 E) / 0 km	2012/12/27 to 2013/1/24	261876	90302.1	2.9	113424	< 0.00001
	Weekly based outbreak	P	(30.417000 N, 30.900000 E) / 14.01 km	2013/2/3 to 2013/4/27	567398	158029	3.59	353456	< 0.00001
		S1	(30.500291 N, 31.072923 E) / 4.04 km	2012/11/25 to 2012/12/8	261876	45151	5.8	253349	< 0.00001
		S2	(30.578633 N, 31.218622 E) / 6.61 km	2012/12/2 to 2012/12/29	349168	94817.2	3.68	214588	< 0.00001
		S3	(30.658000 N, 31.005000 E) / 0 km	2012/12/9 to 2012/12/15	87292	3010.07	29	211077	< 0.00001
		S4	(30.250000 N, 31.067000 E) / 0 km	2012/11/4 to 2012/11/10	130938	11287.8	11.6	204166	< 0.00001
		S5	(30.297742 N, 30.978380 E) / 0 km	2012/12/23 to 2013/1/26	261876	90302.1	2.9	113424	< 0.00001
	Monthly based outbreak	P	(30.371835 N, 30.959693 E) / 6.46 km	2013/3/29 to 2013/4/27	218230	18812.9	11.6	343597	< 0.00001
		S1	(30.644000 N, 31.052000 E) / 16.48 km	2012/11/29 to 2012/12/28	523752	189634	2.76	223030	< 0.00001
		S2	(30.548447 N, 30.904893 E) / 2.34 km	2013/1/28 to 2013/2/26	261876	54181.2	4.83	213861	< 0.00001
		S3	(30.297742 N, 30.978380 E) / 0 km	2012/12/29 to 2013/1/27	174584	45151	3.87	110102	< 0.00001
		S4	(30.276390 N, 31.062500 E) / 0 km	2013/1/28 to 2013/2/26	87292	18060.4	4.83	69262.5	< 0.00001
		S5	(30.453000 N, 31.043000 E) / 4.30 km	2013/1/28 to 2013/2/26	87292	18060.4	4.83	69262.5	< 0.00001
EW6	Daily based outbreak	P	(30.367000 N, 30.933000 E) / 7.97 km	2014/12/31 to 2015/1/14	261876	34916.8	7.5	309445	< 0.00001
		S1	(30.649000 N, 30.998000 E) / 6.02 km	2013/12/25 to 2014/5/7	174584	12470.3	14	303021	< 0.00001
		S2	(30.509617 N, 30.948347 E) / 6.29 km	2015/2/20 to 2015/3/4	218230	26187.6	8.33	276883	< 0.00001
		S3	(30.470000 N, 31.069000 E) / 6.27 km	2014/11/26 to 2014/11/29	174584	14964.3	11.67	273553	< 0.00001
		S4	(30.502780 N, 30.850280 E) / 0 km	2015/1/16 to 2015/1/23	174584	19952.5	8.75	228058	< 0.00001
		S5	(30.583330 N, 30.900000 E) / 1.12 km	2014/11/25 to 2014/12/3	174584	19952.5	8.75	228058	< 0.00001
		S6	(30.297503 N, 30.968817 E) / 0 km	2014/6/2 to 2014/6/2	87292	2494.06	35	226744	< 0.00001
		S7	(30.560716 N, 31.000078 E) / 0 km	2014/12/10 to 2014/12/10	87292	2494.06	35	226744	< 0.00001
		S8	(30.297500 N, 30.968800 E) / 0 km	2013/10/22 to 2013/10/22	87292	2494.06	35	226744	< 0.00001
		S9	(30.524800 N, 31.146400 E) / 0 km	2013/11/29 to 2013/11/29	87292	2494.06	35	226744	< 0.00001
		S10	(30.561000 N, 31.000000 E) / 0 km	2015/2/10 to 2015/2/10	87292	2494.06	35	226744	< 0.00001
		S11	(30.307154 N, 31.093698 E) / 4.31 km	2015/1/16 to 2015/1/21	174584	22446.5	7.78	209863	< 0.00001
		S12	(30.372025 N, 31.053179 E) / 4.57 km	2015/2/12 to 2015/2/16	174584	24940.6	7	193839	< 0.00001
		S13	(30.558000 N, 30.839000 E) / 4.93 km	2015/10/2 to 2016/2/24	87292	3741.09	23.33	192563	< 0.00001
		S14	(30.239000 N, 31.074000 E) / 1.38 km	2014/3/25 to 2014/5/25	87292	4988.11	17.5	168664	< 0.00001
	Weekly based outbreak	P	(30.649000 N, 30.998000 E) / 6.02 km	2013/12/25 to 2014/5/13	174584	12470.3	14	303021	< 0.00001
		S1	(30.509617 N, 30.948347 E) / 6.29 km	2015/2/18 to 2015/3/10	218230	26187.6	8.33	276883	< 0.00001
		S2	(30.341860 N, 30.855531 E) / 6.85 km	2014/12/31 to 2015/1/6	174584	14964.3	11.67	273553	< 0.00001
		S3	(30.470000 N, 31.069000 E) / 6.27 km	2014/11/26 to 2014/12/2	174584	14964.3	11.67	273553	< 0.00001
		S4	(30.317200 N, 31.030600 E) / 2.98 km	2015/1/14 to 2015/1/20	174584	17458.4	10	249004	< 0.00001
		S5	(30.297503 N, 30.968817 E) / 0 km	2014/5/28 to 2014/6/3	87292	2494.06	35	226744	< 0.00001
		S6	(30.560716 N, 31.000078 E) / 0 km	2014/12/10 to 2014/12/16	87292	2494.06	35	226744	< 0.00001
		S7	(30.573330 N, 30.898610 E) / 0 km	2014/12/3 to 2014/12/9	87292	2494.06	35	226744	< 0.00001
		S8	(30.297500 N, 30.968800 E) / 0 km	2013/10/22 to 2013/10/29	87292	2494.06	35	226744	< 0.00001
		S9	(30.524800 N, 31.146400 E) / 0 km	2013/11/27 to 2013/12/3	87292	2494.06	35	226744	< 0.00001
		S10	(30.502780 N, 30.850280 E) / 0 km	2015/1/14 to 2015/1/27	174584	24940.6	7	193839	< 0.00001
		S11	(30.372025 N, 31.053179 E) / 4.57 km	2015/2/11 to 2015/2/17	174584	24940.6	7	193839	< 0.00001
		S12	(30.558000 N, 30.839000 E) / 4.93 km	2015/9/30 to 2016/3/1	87292	3741.09	23.33	192563	< 0.00001
		S13	(30.307154 N, 31.093698 E) / 0 km	2014/6/18 to 2014/6/24	87292	4988.11	17.5	168664	< 0.00001
		S14	(30.239000 N, 31.074000 E) / 1.38 km	2014/3/19 to 2014/5/27	87292	4988.11	17.5	168664	< 0.00001
	Monthly based outbreak	P	(30.470496 N, 30.996912 E) / 10.06 km	2015/1/31 to 2015/7/29	698336	284323	2.46	246102	< 0.00001
		S1	(30.649000 N, 30.998000 E) / 6.02 km	2013/12/7 to 2014/6/4	174584	19952.5	8.75	228058	< 0.00001
		S2	(30.424933 N, 30.617138 E) / 24.65 km	2015/1/1 to 2015/1/30	261876	52375.2	5	219457	< 0.00001
		S3	(30.230400 N, 30.972600 E) / 8.68 km	2013/10/22 to 2014/6/4	261876	52375.2	5	219457	< 0.00001
		S4	(30.533670 N, 30.863729 E) / 2.90 km	2015/9/28 to 2016/2/24	87292	3741.09	23.33	192563	< 0.00001
		S5	(30.524800 N, 31.146400 E) / 0 km	2013/10/22 to 2013/12/6	87292	4988.11	17.5	168664	< 0.00001
		S6	(30.317200 N, 31.030600 E) / 2.98 km	2015/1/1 to 2015/1/30	174584	34916.8	5	144595	< 0.00001
		S7	(30.594676 N, 31.072450 E) / 0 km	2016/11/21 to 2016/12/20	43646	623.51	70	142712	< 0.00001
		S8	(30.276390 N, 31.062500 E) / 0 km	2016/6/24 to 2016/7/23	43646	623.51	70	142712	< 0.00001
		S9	(30.583330 N, 30.900000 E) / 1.12 km	2014/11/2 to 2014/12/31	174584	39904.9	4.37	126044	< 0.00001
		S10	(30.379770 N, 30.911899 E) / 0 km	2014/12/2 to 2014/12/31	87292	9976.23	8.75	113015	< 0.00001
		S11	(30.307154 N, 31.093698 E) / 0 km	2014/6/5 to 2014/7/4	87292	9976.23	8.75	113015	< 0.00001
		S12	(30.320049 N, 31.065899 E) / 2.06 km	2015/11/27 to 2015/12/26	43646	1870.54	23.33	95991.4	< 0.00001
*P-Primary cluster; S-secondary clusters

## Sheet: Table (3)
Table (3): Spatial distribution of daily, weekly, and monthly significant clusters of HPAI H5N1 outbreaks detected by space-time permutation scan statistic for six epidemic waves in Menofia governorate
Epidemic wave		Cluster type	Location
1st EW	Daily based outbreak	P	Tala
		S1	ElTahrir, Ezbet_ElHushy, AdnanMadani, Badr, Eldelengal, Aboteshaba,Dilehmu, Zaweit_Razin, Tahway,Kafr_Dawoud, Sunsaft, Gezi, Behwash,Munsah, Sedoud, Shama, Tamalay, Kafr_ElSanabsa, Balmesht, Khamsen,Barheem, Ramlet_AlAngb, Kafr_ElAshry, Minuf
		S2	Elkhadra, Minshat_masguid_elkhedr, MitElWasta, SobkEldahak_1,SobkEldahak, Ebshish, kafr_Zien, Shoubrangoum, Manawahla_elmakatea,MitAfif, Munshat_Demlo, Astanha, Fisha_ElSoghra, Ezbet_abo_Zekry,Aghour_ElRaml, Behnay, MitBarah, OmKhinan, Munshat_Elnour, Manawahla, Ashleem, Munshat_OmKhanan, ElBagur, Kafr_SingilfElkadem,Astanha_kafrhelel, Kafr_mahmoud, Kafr_AlAgayza, Shamandel, Zaweit_Garawan, Kafr_…
		S3	ElDabayba, Tanbasha, Vi, Kafr_Mleig_1, Kafr_Mleig, Berkat_Elsabaee,Toukh_Tanbasha, Melig, Vil, Mitkhalaf_2, MitAboshekha, Abhns, ElshahidFekry, Kafr_Alim, Mitkhalaf_1
		S4	Eshma, ElShohadaa_1, Ramad, Salamon
	Weekly based outbreak	P	Tala
		S1	ElTahrir, Ezbet_ElHushy, AdnanMadani, Badr, Eldelengal, Aboteshaba,Dilehmu, Zaweit_Razin, Tahway, Kafr_Dawoud, Sunsaft, Gezi, Behwash,Munsah, Sedoud, Shama, Tamalay, Kafr_ElSanabsa, Balmesht, Khamsen,Barheem, Ramlet_AlAngb, Kafr_ElAshry, Minuf
		S2	Elkhadra, Minshat_masguid_elkhedr, MitElWasta, SobkEldahak_1, SobkEldahak, Ebshish, kafr_Zien, Shoubrangoum, Manawahla_elmakatea, MitAfif, Munshat_Demlo, Astanha, Fisha_ElSoghra, Ezbet_abo_Zekry, Aghour_ElRaml, Behnay, MitBarah, OmKhinan, Munshat_Elnour, Manawahla, Ashleem, Munshat_OmKhanan, ElBagur, Kafr_SingilfElkadem, Astanha_kafrhelel, Kafr_mahmoud, Kafr_AlAgayza, Shamandel, Zaweit_Garawan, K…
		S3	ElDabayba, Tanbasha, Vi, Kafr_Mleig_1, Kafr_Mleig, Berkat_Elsabaee,Toukh_Tanbasha, Melig, Vil, Mitkhalaf_2, MitAboshekha, Abhns,ElshahidFekry, Kafr_Alim, Mitkhalaf_1
	Monthly based outbreak	P	ElTahrir, Ezbet_ElHushy, AdnanMadani, Badr, Eldelengal, Aboteshaba,Dilehmu, Zaweit_Razin, Tahway, Kafr_Dawoud, Sunsaft, Gezi, Behwash,Munsah, Sedoud, Shama, Tamalay, Kafr_ElSanabsa, Balmesht, Khamsen,Barheem, Ramlet_AlAngb, Kafr_ElAshry, Minuf
		S1	Tala
		S2	Mitmasoud, Elhy_Elkebly, Munshat_Assem, MitKhakan, Shibin_ElKom_1,Shibin_ElKom, Ezbet_ElGebaly, Elmesilha, Elmay, Kafr_AlMusaylha,Kafr_Tanbidy, kafr_shnofa, Elraheb, Kafr_Hamam, Mitkhalaf, Singirg_1,Dakma, Mitkhalaf_2, Kafr_Sarsamos, Kafr_Dokmak, Shanoufa, Shanawan,ShoubraBas, Mitkhalaf_1, ElBatanon, Singrig_2, MitAboshekha,Shoubrabeloula, Sarsamos, Singrig, Dalaton, Kamshiesh, MitElMoz,MitElkosa…
2ndEW	Daily based outbreak	P	Donshiwai, AbuKullus, ElShohadaa_2, Beshay, Ebshady, Ramad, Danasour,Munshat_Elsadat, Salamon, Kafr_ashabaa, Gezirt_Elhagar, ElShohadaa_1, Seresna, Eshma, Daraguil, Beshtamy, Zaweit_elnaoura, Nader, Sarsamos, ElEraqia, Amroos, Toukh_Dalaka, Zorkan, Kamshiesh, Albendaria, Kafr_Sarsamos, Kafr_Shehata, ShoubraBas, Debirky, Munshat_Sultan, Kafr_Askar, Gedam, Tamalay, Kafr_Elelwy, Tanoub, Tabloha_1, D…
		S1	ElshahidFekry, Abomashhoor, Toukh_Tanbasha, ElRamaly, Arab_elraml, Kafr_Soliman, Mastay, Kafr_AlAkram, Kafr_Alim, Tanbasha, Abhns, Begeram, Qwesna_ElBalad_1, Berkat_Elsabaee, Kafr_Hourin, Kafr_Nefra, Bany_Gharian, Damhoog
		S2	Kafr_manawhla, Ezbet_komEldab', Manawahla, Dalaton, Ezbet_eleslah, Munshat_Elnour, Manawahla_elmakatea, Kafr_Elzagazigkeble, MitRabei, Zaweit_Garawan, Kafr_Alramah, Shanawan, Munshat_OmKhanan, Ebshish, Shubrazengi, SobkEldahak, Elraheb, Kafr_Hamam, MitElkosary, Garawan, SobkEldahak_1, ElBagur, Kafr_Shoubrabeloula, MitElWasta, ElHamoul, Kafr_ElBagur, Kafr_Dokmak, Shoubrabeloula, Kafr_AlMusaylha, S…
		S3	Mitmasoud
		S4	Shantana_ElHagar
		S5	Sarawa
		S6	Ganzour
		S7	SobkElAhad_1
		S8	ElTahrir, Ezbet_ElHushy, AdnanMadani, Badr
		S9	Sedoud, Kafr_ElSanabsa, Behwash, Shama, Ezbet_elamra, Fisha_Elkobra, Kafr_Fisha
		S10	Minshat_masguid_elkhedr
		S11	Samaleig, kafr_eltebs, kafr_elsokaria, Betebs, MitElMoz, ElBatanon
	Weekly based outbreak	P	Kafr_Sarsamos, Sarsamos, Kamshiesh, ShoubraBas, Seresna, ElShohadaa_1, ElBatanon, Eshma, Kafr_Tanbidy, Mitmasoud, MitKhakan, Elhy_Elkebly, Munshat_Assem, ElEraqia, Dakma, Zorkan, Elmay, Munshat_Elsadat
		S1	Sarawa
		S2	Kafr_manawhla, Ezbet_komEldab', Manawahla, Dalaton, Ezbet_eleslah, Munshat_Elnour, Manawahla_elmakatea, Kafr_Elzagazigkeble, MitRabei, Zaweit_Garawan, Kafr_Alramah, Shanawan, Munshat_OmKhanan, Ebshish, Shubrazengi, SobkEldahak, Elraheb, Kafr_Hamam, MitElkosary, Garawan,SobkEldahak_1, ElBagur, Kafr_Shoubrabeloula, MitElWasta, ElHamoul, Kafr_ElBagur, Kafr_Dokmak, Shoubrabeloula, Kafr_AlMusaylha, Sh…
		S3	ElTahrir, Ezbet_ElHushy, AdnanMadani, Badr
		S4	Tanbasha, ElDabayba, Toukh_Tanbasha, Berkat_Elsabaee
		S5	Kafr_ElAshry, Barheem, Ghamreen, Khamsen, Balmesht, Minuf, Ezbet_elarab, Kamshoush, Debirky, Munshat_Sultan
		S6	Berah_ElAgoz, Kfour_ElRaml_1, Kfour_ElRaml_2, Shoubrabkhom, Qwesna_2, ElzaheerElreefy, Qwesna_1, Begeram, Qwesna_ElBalad_1, Damhoog, Qwesna, Kafr_AboElhasan, Kafr_abdo, Qwesna_ElBalad_2, Kafr_AlAkram, Bany_Gharian, Kafr_Soliman, Kafr_BanyGhrian, Astanha_kafrhelel, MitBarah, Arab_elraml, ElRamaly, Kafr_Banigherban, Aghour_ElRaml, Shamandel_1, Abomashhoor, Shamandel
		S7	Ganzour
		S8	Shantana_ElHagar
		S9	Singrig, Singrig_2
		S10	kashtokh, Zaweit_Bmm, Kafr_Alarab, Tala, Kafr_Elelwy, Kafr_Askar, Kafr_Shehata, Albendaria, Tabloha_1, Gedam, Tabloha, Toukh_Dalaka
		S11	Minshat_masguid_elkhedr
	Monthly based outbreak	P	Kafr_Sarsamos, Sarsamos, Kamshiesh, ShoubraBas, Seresna, ElShohadaa_1, ElBatanon, Eshma, Kafr_Tanbidy, Mitmasoud, MitKhakan, Elhy_Elkebly, Munshat_Assem, ElEraqia, Dakma, Zorkan, Elmay, Munshat_Elsadat
		S1	Sarawa
		S2	Vi, Kafr_Mleig_1, Kafr_Mleig, Melig, Vil, Shantana_ElHagar, ElDabayba
		S3	Minshat_masguid_elkhedr
		S4	Singirg_1, Singrig_2
		S5	Tala, Kafr_Alarab, Tabloha_1, Tabloha, Kafr_Askar, Zaweit_Bmm, Kafr_Shehata, Albendaria, Toukh_Dalaka
		S6	Damhoog, Bany_Gharian, Kafr_BanyGhrian, Kafr_AlAkram, Kafr_Soliman, Kafr_Banigherban, Arab_elraml, Mastay, ElRamaly, Begeram, Abomashhoor, Shoubrabkhom, Qwesna_ElBalad_1, Kafr_Helal, ElzaheerElreefy, Qwesna_1, ElshahidFekry, Berah_ElAgoz, Kafr_Nefra, Kfour_ElRaml_1, Kfour_ElRaml_2, Toukh_Tanbasha, Abhns, Qwesna_ElBalad_2, Qwesna_2, Qwesna, Kafr_Alim, Kafr_Hourin, Shamandel_1, Kafr_AboElhasan, Tan…
		S7	Ezbet_komEldab', Ezbet_eleslah, Kafr_manawhla, Manawahla, Munshat_Elnour, Zaweit_Garawan, Kafr_Elzagazigkeble, MitRabei, Dalaton, Kafr_Alramah, Shubrazengi, Manawahla_elmakatea, Garawan, ElBagur, SobkEldahak, Ebshish, Shanawan, Kafr_ElBagur, SobkEldahak_1, Kafr_Shoubrabeloula, Munshat_OmKhanan, ElHamoul, Kafr_Hamam, Kafr_SingilfElkadem, MitElWasta, Ezbet_abo_Zekry, Astanha,Fisha_ElSoghra, Elraheb…
3rdEW	Daily based outbreak	P	MitAfif, Behnay, Kafr_mahmoud, Bir_Shams, Astanha, Fisha_ElSoghra, Ezbet_abo_Zekry, Kafr_Gonamyia, BayAlArab, Kafr_Alfarouniya, Kafr_SingilfElkadem, SobkEldahak_1, SobkEldahak, Elkhadra, Kafr_ElKhadra, ElBagur, MitElWasta, Qalta_ElSoghra, ManyalDuwayb, AlFarounia
		S1	Badr, Kafr_Dawoud, Zaweit_Razin, Sunsaft, Gezi, Aboteshaba, Tamalay, Tahway, Ezbet_ElHushy, ElTahrir, Balmesht, Behwash, Dilehmu, Kafr_ElSanabsa, Sedoud, Barheem, Khamsen, AdnanMadani, Kafr_ElAshry, Nader, Shama, Minuf, Briek, Ezbet_elarab, Kamshoush, Debirky, Munsah, Gezirt_Elhagar, Ghamreen, Ramlet_AlAngb, Ezbet_elamra, Fisha_Elkobra, Kafr_Fisha, Zaweit_elnaoura, Munshat_Sultan, Salamon, Albesh…
		S2	Qalta_Alkubra
		S3	Shamandel_1, Ezbet_Aboelnasr, Qwesna_ElBalad_2, Shamandel, Qwesna, Kafr_AboElhasan, Ashleem, TahaShubra, Astanha_kafrhelel, Kafr_AlAgayza, Kafr_abdo, Abhns, ElzaheerElreefy, Qwesna_1, OmKhinan, Munshat_Demlo, Qwesna_2, Qwesna_ElBalad_1, Aghour_ElRaml, Shoubrangoum, Kfour_ElRaml_1, Kfour_ElRaml_2, Begeram, MitAboshekha, kafr_Zien, MitElkosary, MitBarah, Mitkhalaf_1, Munshat_OmKhanan, Mitkhalaf_2, …
		S4	Kafr_AlMusaylha
		S5	Tala
		S6	AboSalah, Ezbet_elbasha, Ashmun_1, Ashmun
		S7	MitElMoz, Betebs, Kafr_Mleig, Kafr_Mleig_1
		S8	Elmay
	Weekly based outbreak	P	Shamandel_1, Ezbet_Aboelnasr, Qwesna_ElBalad_2, Shamandel, Qwesna, Kafr_AboElhasan, Ashleem, TahaShubra, Astanha_kafrhelel, Kafr_AlAgayza, Kafr_abdo, Abhns, ElzaheerElreefy, Qwesna_1, OmKhinan, Munshat_Demlo, Qwesna_2, Qwesna_ElBalad_1, Aghour_ElRaml, Shoubrangoum, Kfour_ElRaml_1, Kfour_ElRaml_2, Begeram, MitAboshekha, kafr_Zien, MitElkosary, MitBarah, Mitkhalaf_1, Munshat_OmKhanan, Mitkhalaf_2, …
		S1	Salamon, Ramad, Eshma, Zaweit_elnaoura, ElShohadaa_1, Gezirt_Elhagar, Beshay, ElShohadaa_2, ElEraqia, Nader, Donshiwai, AbuKullus, Seresna, Munshat_Elsadat, Debirky, Sarsamos, Munshat_Sultan, ShoubraBas, Danasour, Ebshady, Tamalay, Kafr_Sarsamos, Kafr_ashabaa, Dakma, Kamshiesh, Singrig_2, Ghamreen, Kafr_ElAshry, Daraguil, Barheem, Zorkan, Singrig, Singirg_1, Toukh_Dalaka, Beshtamy, Elmay, kafr_sh…
		S2	AboSalah, Ezbet_elbasha, Ashmun_1, Ashmun
		S3	Qalta_Alkubra
		S4	Ganzour
		S5	MitAfif, Behnay, Kafr_mahmoud, Bir_Shams, Astanha, Fisha_ElSoghra, Ezbet_abo_Zekry, Kafr_Gonamyia, BayAlArab, Kafr_Alfarouniya, Kafr_SingilfElkadem, SobkEldahak_1, SobkEldahak, Elkhadra, Kafr_ElKhadra, ElBagur, MitElWasta, Qalta_ElSoghra, ManyalDuwayb, AlFarounia
	Monthly based outbreak	P	AboSalah, Ezbet_elbasha, Ashmun_1, Ashmun
		S1	Betebs, Samaleig, MitElMoz, kafr_elsokaria, kafr_eltebs, ElBatanon, Kafr_Mleig, Kafr_Mleig_1, Melig, Vil, Shantana_ElHagar, Ganzour, Tabloha, Vi, Kafr_Tanbidy, Tabloha_1, Kamshiesh, Zorkan, Tala, ElRawda, Kafr_Alarab, Kafr_Sarsamos, Berkat_Elsabaee, ElDabayba, Toukh_Dalaka, MitKhakan, Elhy_Elkebly, Munshat_Assem, Kafr_Askar, Tanbasha, Mitmasoud, Shibin_ElKom, Sarsamos, Kafr_Alim,Shibin_ElKom_1, A…
4thEW	Daily based outbreak	P	MitElWasta, SobkEldahak_1, SobkEldahak, Ebshish, Elkhadra, Minshat_masguid_elkhedr, Manawahla_elmakatea, kafr_Zien,Munshat_Elnour, Manawahla, Astanha, Fisha_ElSoghra, Ezbet_abo_Zekry, Shoubrangoum, ElBagur, Munshat_OmKhanan, Zaweit_Garawan, Ezbet_komEldab', Kafr_manawhla, Kafr_SingilfElkadem, Munshat_Demlo, OmKhinan, MitAfif, Ezbet_eleslah, Behnay, BayAlArab, Kafr_ElBagur, Kafr_AlAgayza, Ashleem,…
		S1	Abhns, Qwesna_ElBalad_2, Qwesna_ElBalad_1, ElzaheerElreefy, Qwesna_1, Shamandel_1, Begeram, ElshahidFekry, ElRamaly
		S2	Kafr_Soliman, Arab_elraml
		S3	Srohet
		S4	ManyalGwida
		S5	Sintris
		S6	Zorkan, Toukh_Dalaka, Tabloha_1, Tabloha, Kamshiesh, Kafr_Askar
		S7	Kafr_Mleig_1, Kafr_Mleig, Vi, Melig, Vil, Shantana_ElHagar, MitElMoz, ElDabayba
		S8	Kafr_Dawoud, Gezi, Sunsaft, Tamalay, Balmesht, Zaweit_Razin
		S9	Samaleig, kafr_eltebs
		S10	ElShohadaa_1, Eshma, Seresna, Ramad, Sarsamos, Salamon, Munshat_Elsadat, Beshay, ElShohadaa_2, ElEraqia, Zaweit_elnaoura, Kafr_Sarsamos
		S11	Kafr_Nefra
		S12	Talia
		S13	Elmesilha, Ezbet_ElGebaly, Shibin_ElKom, Kafr_AlMusaylha, Mitkhalaf, Shibin_ElKom_1
		S14	AbuKullus, Donshiwai
		S15	ElNinaiyah, Quras, Kafr_ElHama, Shatanof
		S16	Khamsen
		S17	Kafr_ElSanabsa
		S18	Kafr_Hamam
		S19	Singirg_1
		S20	Minuf
		S21	Briek, Ezbet_elarab, Kamshoush
		S22	kafr_shnofa
		S23	Elhy_Elkebly, Munshat_Assem
		S24	Ghamreen, Kafr_ElAshry, Barheem, Munshat_Sultan
		S25	Shanoufa, Shoubrabeloula
	Weekly based outbreak	P	MitElWasta, SobkEldahak_1, SobkEldahak, Ebshish, Elkhadra, Minshat_masguid_elkhedr, Manawahla_elmakatea, kafr_Zien, Munshat_Elnour, Manawahla, Astanha, Fisha_ElSoghra, Ezbet_abo_Zekry, Shoubrangoum, ElBagur, Munshat_OmKhanan, Zaweit_Garawan, Ezbet_komEldab', Kafr_manawhla, Kafr_SingilfElkadem, Munshat_Demlo, OmKhinan, MitAfif, Ezbet_eleslah, Behnay, BayAlArab, Kafr_ElBagur, Kafr_AlAgayza, Ashleem…
		S1	Abhns, Qwesna_ElBalad_2, Qwesna_ElBalad_1, ElzaheerElreefy, Qwesna_1, Shamandel_1, Begeram, ElshahidFekry, ElRamaly
		S2	Kafr_Soliman, Arab_elraml
		S3	SobkElAhad, SobkElAhad_1, Sintris, Sarawa, Mahalet_Sobk, Shoshy, Samali, AlFarounia, Ashmun, ManyalDuwayb, Seman, Talia
		S4	Zorkan, Toukh_Dalaka, Tabloha_1, Tabloha, Kamshiesh, Kafr_Askar
		S5	Megaria, Albesha, Ramlet_AlAngb, Srohet, Telwana, Samadon
		S6	Kafr_Mleig_1, Kafr_Mleig, Vi, Melig, Vil, Shantana_ElHagar, MitElMoz, ElDabayba
		S7	Kafr_Nefra
		S8	ManyalGwida
		S9	ElShohadaa_1, Eshma, Seresna, Ramad, Sarsamos, Salamon, Munshat_Elsadat, Beshay, ElShohadaa_2, ElEraqia, Zaweit_elnaoura, Kafr_Sarsamos
		S10	Kafr_Dawoud, Gezi, Sunsaft, Tamalay, Balmesht, Zaweit_Razin
		S11	AbuKullus, Donshiwai
		S12	ElNinaiyah, Quras, Kafr_ElHama, Shatanof
		S13	Samaleig, kafr_eltebs
		S14	Elmesilha, Ezbet_ElGebaly, Shibin_ElKom, Kafr_AlMusaylha, Mitkhalaf,Shibin_ElKom_1
		S15	Kafr_Hamam
		S16	Singirg_1
		S17	Minuf
		S18	Briek, Ezbet_elarab, Kamshoush
		S19	kafr_shnofa
		S20	Shanoufa, Shoubrabeloula
		S21	Barheem
	Monthly based outbreak	P	Begeram, Qwesna_ElBalad_1, ElzaheerElreefy, Qwesna_1, Kafr_AlAkram, Kafr_Soliman, ElRamaly, Arab_elraml, Abomashhoor, Damhoog,Qwesna_ElBalad_2, Abhns, Kfour_ElRaml_1, Kfour_ElRaml_2, ElshahidFekry, Mastay, Qwesna, Qwesna_2, Bany_Gharian, Kafr_BanyGhrian
		S1	MitElWasta, SobkEldahak_1, SobkEldahak, Ebshish, Elkhadra,Minshat_masguid_elkhedr, Manawahla_elmakatea, kafr_Zien, Munshat_Elnour, Manawahla, Astanha, Fisha_ElSoghra, Ezbet_abo_Zekry, Shoubrangoum, ElBagur, Munshat_OmKhanan, Zaweit_Garawan, Ezbet_komEldab', Kafr_manawhla, Kafr_SingilfElkadem, Munshat_Demlo, OmKhinan, MitAfif, Ezbet_eleslah, Behnay, BayAlArab, Kafr_ElBagur,Kafr_AlAgayza, Ashleem, …
		S2	Zorkan, Toukh_Dalaka, Tabloha_1, Tabloha, Kamshiesh, Kafr_Askar
		S3	SobkElAhad, SobkElAhad_1, Sintris, Sarawa, Mahalet_Sobk, Shoshy, Samali, AlFarounia, Ashmun, ManyalDuwayb, Seman, Talia
		S4	Samaleig, kafr_eltebs
		S5	ManyalGwida
		S6	Srohet
		S7	AdnanMadani, Eldelengal, ElTahrir, Ezbet_ElHushy, Badr, Kafr_Dawoud
		S8	Elmesilha, Ezbet_ElGebaly, Shibin_ElKom, Kafr_AlMusaylha, Mitkhalaf, Shibin_ElKom_1
		S9	Minuf
		S10	ElShohadaa_1, Eshma, Seresna, Ramad, Sarsamos, Salamon, Munshat_Elsadat, Beshay, ElShohadaa_2, ElEraqia, Zaweit_elnaoura, Kafr_Sarsamos
		S11	Zaweit_Razin, Sunsaft, Behwash, Sedoud
		S12	Kafr_Hamam
		S13	ElNinaiyah, Quras, Kafr_ElHama, Shatanof
		S14	Donshiwai, AbuKullus
		S15	Singirg_1
		S16	Dilehmu, Aboteshaba, Tahway
		S17	Elhy_Elkebly, Munshat_Assem
		S18	kafr_shnofa
5thEW	Daily based outbreak	P	Munshat_OmKhanan, MitElkosary, OmKhinan, Kafr_AlAgayza, Ebshish, Manawahla_elmakatea, kafr_Zien, TahaShubra
		S1	Sedoud, Kafr_ElSanabsa, Behwash, Shama, Ezbet_elamra, Fisha_Elkobra, Kafr_Fisha, Zaweit_Razin, Minuf, Briek, Ezbet_elarab, Kamshoush, Khamsen, Balmesht, Sunsaft, Albesha, Ramlet_AlAngb, Tahway, Gezi, Barheem, Aboteshaba, Munsah, Megaria, Kafr_ElAshry, Srohet, Kafr_Dawoud, Ghamreen, ElHamoul, Dilehmu, Kafr_Shoubrabeloula, Shubrazengi, Telwana, Samadon, Garawan, Tamalay, Kafr_Alramah, Singrig, MitR…
		S2	Shatanof
		S3	Shoubrabkhom, Berah_ElAgoz, Damhoog, Kafr_Banigherban, Kfour_ElRaml_1, Kfour_ElRaml_2, Kafr_BanyGhrian, Bany_Gharian, Begeram, Kafr_AlAkram, ElzaheerElreefy, Qwesna_1
		S4	Qwesna_2
		S5	Quras
		S6	kafr_elsokaria
		S7	ElRawda, Shantana_ElHagar
		S8	Ashmun
	Weekly based outbreak	P	Sedoud, Kafr_ElSanabsa, Behwash, Shama, Ezbet_elamra, Fisha_Elkobra, Kafr_Fisha, Zaweit_Razin, Minuf, Briek, Ezbet_elarab, Kamshoush, Khamsen, Balmesht, Sunsaft, Albesha, Ramlet_AlAngb, Tahway, Gezi, Barheem, Aboteshaba, Munsah, Megaria, Kafr_ElAshry, Srohet, Kafr_Dawoud, Ghamreen, ElHamoul, Dilehmu, Kafr_Shoubrabeloula, Shubrazengi, Telwana, Samadon, Garawan, Tamalay, Kafr_Alramah, Singrig, MitR…
		S1	Munshat_OmKhanan, MitElkosary, OmKhinan, Kafr_AlAgayza, Ebshish, Manawahla_elmakatea, kafr_Zien, TahaShubra
		S2	Shoubrabkhom, Berah_ElAgoz, Damhoog, Kafr_Banigherban, Kfour_ElRaml_1, Kfour_ElRaml_2, Kafr_BanyGhrian, Bany_Gharian, Begeram, Kafr_AlAkram, ElzaheerElreefy, Qwesna_1
		S3	kafr_elsokaria
		S4	Shatanof
		S5	Ashmun
	Monthly based outbreak	P	Megaria, Albesha, Ramlet_AlAngb, Srohet, Telwana, Samadon, Shanshor, Shama, Ezbet_elamra, Fisha_Elkobra, Kafr_Fisha, Qalta_Alkubra, Munsah, Shoshy
		S1	Shantana_ElHagar, Melig, Vil, Kafr_Mleig, Kafr_Mleig_1, ElRawda, Berkat_Elsabaee, MitElMoz, Ganzour, Betebs, kafr_elsokaria, Kafr_Alim, Samaleig, Tanbasha, ElDabayba, Kafr_Hourin, kafr_eltebs, Toukh_Tanbasha, ElBatanon, Kafr_Tanbidy, ElshahidFekry, Tabloha, Abomashhoor, Kafr_Nefra, Mastay, Mitkhalaf_2, Tabloha_1, Kafr_Alarab, ElRamaly, Arab_elraml, Abhns, MitKhakan, Elmesilha, Elhy_Elkebly, Munsh…
		S2	ElEraqia, Zaweit_elnaoura, Munshat_Sultan
		S3	Ashmun
		S4	Quras
		S5	Munshat_Elnour, Manawahla, Ezbet_komEldab', Zaweit_Garawan, Ezbet_eleslah, Kafr_manawhla, SobkEldahak, Manawahla_elmakatea, ElBagur, SobkEldahak_1, Garawan, Shubrazengi, Ebshish, Kafr_Elzagazigkeble, Kafr_ElBagur
6thEW	Daily based outbreak	P	Ramlet_AlAngb, Shama, Megaria, Albesha, Munsah, Samadon, Behwash, Ezbet_elamra, Fisha_Elkobra, Kafr_Fisha, Srohet, Tahway, Sedoud, Telwana, Shanshor, AboSalah, Dilehmu, Aboteshaba, Shoshy
		S1	Samaleig, kafr_eltebs, kafr_elsokaria, Betebs, MitElMoz, ElBatanon, Tabloha, Ganzour, Tabloha_1, Kafr_Mleig, Shantana_ElHagar, Melig, Vil, Kafr_Mleig_1, Tala
		S2	Singrig, Singrig_2, Singirg_1, Shoubrabeloula, Dakma, Shanoufa, kafr_shnofa, Ghamreen, Elmay, Munshat_Sultan, ElHamoul, Kafr_Hamam, Kafr_Shoubrabeloula, ShoubraBas, Kafr_ElAshry, Debirky, ElEraqia, Briek, Ezbet_elarab, Kamshoush, Minuf
		S3	Manawahla_elmakatea, Ebshish, Manawahla, Munshat_Elnour, Kafr_manawhla, MitElWasta, Munshat_OmKhanan, SobkEldahak, SobkEldahak_1, Ezbet_komEldab', kafr_Zien, Ezbet_eleslah, Dalaton, Zaweit_Garawan, OmKhinan, MitElkosary, Minshat_masguid_elkhedr, ElBagur, Shoubrangoum, Kafr_AlAgayza, Elkhadra, Munshat_Demlo, Shanawan
		S4	Tamalay
		S5	ElShohadaa_1, Eshma
		S6	Ashmun_1
		S7	Elhy_Elkebly, Munshat_Assem
		S8	Ezbet_elbasha
		S9	Kafr_AboElhasan
		S10	MitKhakan
		S11	Shanawai, Saket_aboshara, Kafr_ElHama, Samali, ElNinaiyah, Sintris
		S12	Bir_Shams, Kafr_mahmoud, Kafr_Gonamyia, Behnay, Qalta_ElSoghra, Kafr_Alfarouniya, Seman, Kafr_ElKhadra, ManyalDuwayb, Qalta_Alkubra, BayAlArab, AlFarounia, MitAfif, Kafr_SingilfElkadem, Astanha, Fisha_ElSoghra
		S13	Gezirt_Elhagar, Salamon, Nader, Ramad, Donshiwai, Zaweit_elnaoura
		S14	Shatanof_EzbetAboYousef, Shatanof_1, Sheshaa
	Weekly based outbreak	P	Samaleig, kafr_eltebs, kafr_elsokaria, Betebs, MitElMoz, ElBatanon, Tabloha, Ganzour, Tabloha_1, Kafr_Mleig, Shantana_ElHagar, Melig, Kafr_Mleig_1, Tala
		S1	Singrig, Singrig_2, Singirg_1, Shoubrabeloula, Dakma, Shanoufa, kafr_shnofa, Ghamreen, Elmay, Munshat_Sultan, ElHamoul, Kafr_Hamam, Kafr_Shoubrabeloula, ShoubraBas, Kafr_ElAshry, Debirky, ElEraqia, Briek, Ezbet_elarab, Kamshoush, Minuf
		S2	Dilehmu, Aboteshaba, Tahway, Munsah, Shama
		S3	Manawahla_elmakatea, Ebshish, Manawahla, Munshat_Elnour, Kafr_manawhla, MitElWasta, Munshat_OmKhanan, SobkEldahak, SobkEldahak_1, Ezbet_komEldab', kafr_Zien, Ezbet_eleslah, Dalaton, Zaweit_Garawan, OmKhinan, MitElkosary, Minshat_masguid_elkhedr, ElBagur, Shoubrangoum, Kafr_AlAgayza, Elkhadra, Munshat_Demlo, Shanawan
		S4	SobkElAhad_1, SobkElAhad, Sarawa, Sintris, Shoshy
		S5	Ashmun_1
		S6	Elhy_Elkebly, Munshat_Assem
		S7	Eshma
		S8	Ezbet_elbasha
		S9	Kafr_AboElhasan
		S10	Tamalay
		S11	Bir_Shams, Kafr_mahmoud, Kafr_Gonamyia, Behnay, Qalta_ElSoghra, Kafr_Alfarouniya, Seman, Kafr_ElKhadra, ManyalDuwayb, Qalta_Alkubra, BayAlArab, AlFarounia, MitAfif, Kafr_SingilfElkadem, Astanha, Fisha_ElSoghra
		S12	Gezirt_Elhagar, Salamon, Nader, Ramad, Donshiwai, Zaweit_elnaoura
		S13	Shanawai
		S14	Shatanof_EzbetAboYousef, Shatanof_1, Sheshaa
	Monthly based outbreak	P	Kafr_Alramah, MitRabei, Kafr_Elzagazigkeble, Kafr_Shoubrabeloula, ElHamoul, Shubrazengi, Ezbet_eleslah, Ezbet_komEldab', Kafr_manawhla, Shoubrabeloula, Dalaton, Zaweit_Garawan, Kafr_Hamam, Garawan, Manawahla, Shanoufa, Munshat_Elnour, Shanawan, Kafr_ElBagur, kafr_shnofa, Singrig, ElBagur, Singirg_1, Elraheb, Manawahla_elmakatea, Kafr_AlMusaylha, Ezbet_elamra, Fisha_Elkobra, Kafr_Fisha, Singrig_2,…
		S1	Samaleig, kafr_eltebs, kafr_elsokaria, Betebs, MitElMoz, ElBatanon, Tabloha, Ganzour, Tabloha_1, Kafr_Mleig, Shantana_ElHagar, Melig, Kafr_Mleig_1, Tala
		S2	AdnanMadani, Eldelengal, ElTahrir, Ezbet_ElHushy, Badr, Kafr_Dawoud, Zaweit_Razin, Sunsaft, Gezi, Aboteshaba, Tamalay, Dilehmu
		S3	Alharam, Elbaranya, Talia_1, Talia, Elkhour, ManyalArus, Elhelwasy, Mahalet_Sobk, Ezbet_elbasha, Ashmun_1, Ashmun, ManyalGwida, Sheshaa
		S4	Nader, Debirky, Zaweit_elnaoura
		S5	Kafr_AboElhasan
		S6	SobkElAhad_1, SobkElAhad, Sarawa, Sintris, Shoshy
		S7	ElDabayba
		S8	Quras
		S9	ElShohadaa_1, Eshma
		S10	Shama
		S11	Shanawai
		S12	Samali, Saket_aboshara, AlFarounia
*P-Primary cluster; S-secondary clusters
